# Supplementary material for: Interval forecasts of weekly incident and cumulative COVID-19 mortality in the United States: A comparison of combining methods
Source: PubMed Central journal article supplement (PMC8963571; doi:10.1371/journal.pone.0266096), 2022-03-29
Supplement: pone.0266096.s004.pdf [file pone.0266096.s004.pdf]

**S3 Table. For incident mortality, calibration for all locations.**

| <b>Quantile</b> | <b>Mean</b> | <b>Median</b> | <b>Ensemble</b> | <b>Sym trim</b> | <b>Exterior trim</b> | <b>Interior trim</b> | <b>Envelope</b> | <b>Inv score</b> | <b>Inv score tuning</b> | <b>Previous best</b> |
|-----------------|-------------|---------------|-----------------|-----------------|----------------------|----------------------|-----------------|------------------|-------------------------|----------------------|
| <i>1</i>        | 5.2         | 2.8           | 2.8             | 3.7             | 5.8                  | 2.9                  | 1.4             | 3.1              | 3.3                     | 4.1                  |
| <i>2.5</i>      | 7.0         | 4.3           | 4.2             | 5.3             | 7.6                  | 3.8                  | 1.4             | 4.8              | 4.7                     | 5.6                  |
| <i>5</i>        | 8.9         | 6.0           | 5.8             | 6.9             | 9.7                  | 5.3                  | 1.5             | 6.9              | 6.6                     | 7.6                  |
| <i>10</i>       | 12.9        | 9.5           | 9.0             | 10.2            | 14.1                 | 8.0                  | 1.5             | 10.8             | 10.1                    | 12.2                 |
| <i>15</i>       | 17.0        | 13.0          | 12.5            | 13.8            | 18.2                 | 11.6                 | 1.6             | 15.0             | 14.3                    | 16.9                 |
| <i>20</i>       | 20.8        | 16.6          | 16.0            | 17.1            | 22.2                 | 15.1                 | 1.7             | 19.1             | 18.4                    | 20.9                 |
| <i>25</i>       | 24.9        | 20.6          | 19.9            | 20.9            | 26.4                 | 18.7                 | 1.8             | 23.1             | 22.8                    | 24.9                 |
| <i>30</i>       | 29.0        | 24.7          | 24.0            | 25.0            | 30.9                 | 22.6                 | 1.9             | 27.4             | 27.0                    | 29.1                 |
| <i>35</i>       | 33.7        | 29.2          | 28.5            | 29.3            | 36.0                 | 27.3                 | 2.1             | 32.0             | 31.6                    | 33.2                 |
| <i>40</i>       | 38.6        | 33.6          | 33.0            | 34.1            | 41.4                 | 32.6                 | 2.5             | 36.5             | 36.0                    | 36.7                 |
| <i>45</i>       | 43.4        | 38.2          | 37.9            | 39.0            | 47.0                 | 38.4                 | 3.0             | 41.4             | 41.0                    | 40.9                 |
| <i>50</i>       | 49.2        | 43.6          | 44.1            | 44.5            | 48.1                 | 44.4                 | 3.9             | 46.9             | 46.4                    | 44.7                 |
| <i>55</i>       | 56.0        | 49.7          | 51.3            | 50.9            | 49.9                 | 58.1                 | 95.7            | 54.0             | 52.6                    | 49.0                 |
| <i>60</i>       | 61.4        | 54.8          | 56.3            | 56.3            | 56.0                 | 63.7                 | 96.5            | 59.4             | 57.6                    | 52.6                 |
| <i>65</i>       | 66.6        | 59.4          | 60.7            | 61.3            | 61.9                 | 69.2                 | 97.2            | 64.6             | 62.7                    | 56.9                 |
| <i>70</i>       | 71.8        | 63.9          | 65.1            | 66.2            | 67.3                 | 74.3                 | 97.9            | 69.9             | 67.6                    | 61.4                 |
| <i>75</i>       | 76.3        | 68.5          | 69.7            | 70.8            | 72.1                 | 79.0                 | 98.4            | 74.7             | 72.5                    | 65.6                 |
| <i>80</i>       | 81.2        | 73.0          | 74.2            | 75.8            | 77.4                 | 83.4                 | 98.8            | 79.8             | 77.7                    | 70.4                 |
| <i>80</i>       | 85.5        | 78.2          | 79.3            | 80.8            | 81.8                 | 87.6                 | 99.1            | 84.7             | 82.8                    | 74.9                 |
| <i>90</i>       | 89.7        | 83.0          | 83.8            | 85.9            | 86.4                 | 91.4                 | 99.4            | 89.5             | 87.4                    | 79.7                 |
| <i>95</i>       | 93.7        | 88.4          | 89.1            | 90.9            | 90.8                 | 95.1                 | 99.6            | 94.0             | 92.6                    | 85.9                 |
| <i>97.5</i>     | 95.9        | 91.5          | 92.1            | 93.8            | 93.4                 | 97.0                 | 99.7            | 96.4             | 95.4                    | 89.6                 |
| <i>99</i>       | 97.5        | 93.9          | 94.3            | 95.5            | 95.4                 | 98.3                 | 99.8            | 97.9             | 97.1                    | 92.3                 |
