# Supplementary material for: Interval forecasts of weekly incident and cumulative COVID-19 mortality in the United States: A comparison of combining methods
Source: PubMed Central journal article supplement (PMC8963571; doi:10.1371/journal.pone.0266096), 2022-03-29
Supplement: pone.0266096.s005.pdf [file pone.0266096.s005.pdf]

**S4 Table. For incident mortality, calibration for U.S.**

| <b>Quantile</b> | <b>Mean</b> | <b>Median</b> | <b>Ensemble</b> | <b>Sym trim</b> | <b>Exterior trim</b> | <b>Interior trim</b> | <b>Envelope</b> | <b>Inv score</b> | <b>Inv score tuning</b> | <b>Previous best</b> |
|-----------------|-------------|---------------|-----------------|-----------------|----------------------|----------------------|-----------------|------------------|-------------------------|----------------------|
| 1               | 0.3         | 0.7           | 1.7             | 0.0             | 0.7                  | 0.3                  | 0.0             | 0.0              | 0.0                     | 2.4                  |
| 2.5             | 1.7         | 1.4           | 2.4             | 1.4             | 1.7                  | 1.4                  | 0.0             | 0.3              | 0.3                     | 3.4                  |
| 5               | 2.8         | 2.1           | 3.1             | 2.8             | 2.8                  | 1.0                  | 0.0             | 2.1              | 2.4                     | 4.8                  |
| 10              | 3.5         | 2.8           | 4.1             | 3.5             | 3.5                  | 1.7                  | 0.0             | 2.8              | 3.1                     | 7.9                  |
| 15              | 5.9         | 4.1           | 6.2             | 5.2             | 5.9                  | 2.8                  | 0.0             | 4.1              | 6.2                     | 10.7                 |
| 20              | 8.3         | 5.9           | 8.3             | 6.2             | 8.3                  | 4.8                  | 0.3             | 6.5              | 8.3                     | 17.3                 |
| 25              | 11.4        | 9.0           | 11.4            | 9.6             | 12.1                 | 7.9                  | 0.3             | 10.7             | 11.1                    | 17.9                 |
| 30              | 15.5        | 15.5          | 17.6            | 15.9            | 16.2                 | 11.0                 | 0.3             | 13.1             | 14.8                    | 21.7                 |
| 35              | 22.1        | 18.6          | 20.4            | 18.6            | 22.1                 | 17.6                 | 0.3             | 18.7             | 18.6                    | 21.7                 |
| 40              | 25.6        | 24.2          | 28.0            | 23.8            | 27.3                 | 22.8                 | 0.7             | 22.1             | 21.4                    | 22.4                 |
| 45              | 32.1        | 30.0          | 33.1            | 29.3            | 38.0                 | 28.3                 | 1.0             | 27.6             | 23.8                    | 26.5                 |
| 50              | 37.7        | 35.2          | 38.0            | 34.5            | 38.0                 | 33.5                 | 1.4             | 33.5             | 29.0                    | 29.3                 |
| 55              | 45.2        | 40.7          | 43.4            | 41.4            | 41.1                 | 47.0                 | 95.9            | 43.1             | 36.5                    | 31.3                 |
| 60              | 51.8        | 44.9          | 48.3            | 45.2            | 48.7                 | 53.5                 | 96.9            | 48.3             | 44.2                    | 33.4                 |
| 65              | 57.0        | 50.7          | 53.1            | 52.1            | 55.9                 | 61.4                 | 97.6            | 56.2             | 51.4                    | 37.5                 |
| 70              | 64.5        | 58.6          | 60.0            | 59.3            | 60.4                 | 65.5                 | 98.3            | 63.1             | 55.9                    | 41.7                 |
| 75              | 70.0        | 64.5          | 63.8            | 65.1            | 68.3                 | 72.4                 | 99.0            | 69.7             | 63.1                    | 46.5                 |
| 80              | 75.5        | 68.3          | 67.6            | 69.3            | 73.8                 | 78.3                 | 99.3            | 78.3             | 70.7                    | 54.4                 |
| 80              | 81.4        | 74.1          | 73.7            | 77.2            | 80.0                 | 83.1                 | 99.3            | 83.8             | 79.0                    | 60.3                 |
| 90              | 86.9        | 79.6          | 81.0            | 83.4            | 85.5                 | 89.6                 | 99.7            | 89.6             | 85.2                    | 65.4                 |
| 95              | 93.5        | 89.6          | 89.6            | 92.4            | 90.3                 | 94.8                 | 99.7            | 95.5             | 92.4                    | 79.3                 |
| 97.5            | 95.9        | 92.7          | 92.7            | 94.1            | 92.4                 | 95.9                 | 100.0           | 97.9             | 96.2                    | 91.7                 |
| 99              | 99.3        | 94.5          | 94.8            | 96.6            | 94.8                 | 99.3                 | 100.0           | 99.0             | 96.2                    | 94.5                 |
