# Supplementary material for: Interval forecasts of weekly incident and cumulative COVID-19 mortality in the United States: A comparison of combining methods
Source: PubMed Central journal article supplement (PMC8963571; doi:10.1371/journal.pone.0266096), 2022-03-29
Supplement: pone.0266096.s006.pdf [file pone.0266096.s006.pdf]

**S5 Table. For incident mortality, calibration for high mortality locations.**

| <b>Quantile</b> | <b>Mean</b> | <b>Median</b> | <b>Ensemble</b> | <b>Sym trim</b> | <b>Exterior trim</b> | <b>Interior trim</b> | <b>Envelope</b> | <b>Inv score</b> | <b>Inv score tuning</b> | <b>Previous best</b> |
|-----------------|-------------|---------------|-----------------|-----------------|----------------------|----------------------|-----------------|------------------|-------------------------|----------------------|
| <i>1</i>        | 2.6         | 1.5           | 1.5             | 1.5             | 3.2                  | 1.8                  | 0.3             | 1.4              | 1.5                     | 3.1                  |
| <i>2.5</i>      | 4.2         | 2.8           | 2.8             | 3.0             | 4.9                  | 2.6                  | 0.4             | 2.6              | 2.7                     | 4.1                  |
| <i>5</i>        | 5.8         | 4.1           | 4.0             | 4.5             | 6.5                  | 3.9                  | 0.4             | 4.4              | 4.2                     | 6.2                  |
| <i>10</i>       | 8.9         | 6.5           | 6.4             | 7.1             | 10.1                 | 5.7                  | 0.4             | 7.2              | 6.7                     | 10.4                 |
| <i>15</i>       | 12.9        | 9.3           | 9.1             | 10.6            | 14.1                 | 9.1                  | 0.5             | 10.9             | 10.4                    | 14.1                 |
| <i>20</i>       | 16.4        | 12.7          | 12.5            | 13.8            | 17.9                 | 12.3                 | 0.6             | 14.8             | 14.0                    | 17.9                 |
| <i>25</i>       | 20.4        | 16.5          | 16.3            | 17.3            | 22.0                 | 15.2                 | 0.8             | 18.4             | 18.2                    | 21.6                 |
| <i>30</i>       | 24.8        | 20.4          | 20.4            | 21.4            | 26.6                 | 18.9                 | 0.8             | 22.6             | 22.5                    | 25.3                 |
| <i>35</i>       | 29.6        | 25.4          | 25.5            | 26.0            | 32.0                 | 23.2                 | 0.9             | 27.8             | 27.4                    | 30.8                 |
| <i>40</i>       | 35.1        | 30.4          | 30.7            | 31.1            | 38.0                 | 28.9                 | 1.1             | 32.7             | 32.4                    | 35.6                 |
| <i>45</i>       | 40.5        | 35.2          | 35.8            | 36.4            | 43.5                 | 35.2                 | 1.4             | 38.3             | 37.8                    | 39.7                 |
| <i>50</i>       | 46.6        | 40.9          | 41.6            | 42.1            | 45.2                 | 41.3                 | 1.7             | 44.2             | 43.8                    | 43.5                 |
| <i>55</i>       | 52.4        | 46.9          | 48.3            | 48.6            | 47.1                 | 55.2                 | 96.4            | 51.0             | 50.2                    | 48.4                 |
| <i>60</i>       | 58.2        | 52.7          | 53.8            | 54.5            | 52.8                 | 61.4                 | 97.3            | 57.0             | 55.3                    | 52.8                 |
| <i>65</i>       | 64.1        | 57.8          | 59.0            | 60.6            | 59.4                 | 67.3                 | 98.0            | 63.0             | 61.6                    | 57.2                 |
| <i>70</i>       | 69.8        | 62.6          | 63.9            | 65.9            | 65.5                 | 72.4                 | 98.3            | 68.8             | 66.8                    | 62.0                 |
| <i>75</i>       | 75.0        | 67.6          | 68.7            | 71.3            | 71.2                 | 77.7                 | 98.8            | 74.2             | 72.4                    | 65.9                 |
| <i>80</i>       | 80.7        | 72.8          | 74.2            | 77.2            | 76.8                 | 83.0                 | 99.1            | 80.1             | 78.2                    | 71.9                 |
| <i>85</i>       | 85.6        | 78.6          | 79.8            | 82.5            | 81.7                 | 87.4                 | 99.4            | 85.7             | 83.4                    | 76.6                 |
| <i>90</i>       | 90.5        | 84.0          | 84.6            | 87.8            | 86.9                 | 91.6                 | 99.6            | 91.0             | 88.6                    | 81.5                 |
| <i>95</i>       | 94.6        | 89.6          | 90.1            | 92.2            | 91.4                 | 95.6                 | 99.7            | 95.1             | 93.5                    | 88.2                 |
| <i>97.5</i>     | 96.8        | 92.8          | 93.3            | 95.0            | 94.4                 | 97.4                 | 99.8            | 97.4             | 96.3                    | 91.5                 |
| <i>99</i>       | 98.2        | 95.1          | 95.4            | 96.4            | 96.0                 | 98.4                 | 99.9            | 98.6             | 97.7                    | 93.4                 |
