# Supplementary material for: Interval forecasts of weekly incident and cumulative COVID-19 mortality in the United States: A comparison of combining methods
Source: PubMed Central journal article supplement (PMC8963571; doi:10.1371/journal.pone.0266096), 2022-03-29
Supplement: pone.0266096.s007.pdf [file pone.0266096.s007.pdf]

**S6 Table. For incident mortality, calibration for medium mortality locations.**

| <b>Quantile</b> | <b>Mean</b> | <b>Median</b> | <b>Ensemble</b> | <b>Sym trim</b> | <b>Exterior trim</b> | <b>Interior trim</b> | <b>Envelope</b> | <b>Inv score</b> | <b>Inv score tuning</b> | <b>Previous best</b> |
|-----------------|-------------|---------------|-----------------|-----------------|----------------------|----------------------|-----------------|------------------|-------------------------|----------------------|
| <i>1</i>        | 3.7         | 1.8           | 1.8             | 2.5             | 4.4                  | 1.7                  | 0.5             | 2.0              | 2.1                     | 3.1                  |
| <i>2.5</i>      | 5.6         | 2.9           | 2.9             | 4.1             | 6.1                  | 2.7                  | 0.5             | 3.4              | 3.6                     | 4.9                  |
| <i>5</i>        | 7.4         | 4.6           | 4.5             | 5.6             | 8.2                  | 4.0                  | 0.5             | 5.4              | 5.5                     | 6.6                  |
| <i>10</i>       | 11.7        | 8.1           | 7.9             | 9.0             | 13.0                 | 6.9                  | 0.6             | 9.6              | 9.1                     | 11.4                 |
| <i>15</i>       | 15.7        | 11.4          | 11.4            | 12.9            | 16.9                 | 10.5                 | 0.6             | 14.0             | 13.4                    | 17.0                 |
| <i>20</i>       | 19.7        | 15.2          | 14.9            | 16.1            | 21.0                 | 13.8                 | 0.7             | 18.1             | 17.9                    | 21.0                 |
| <i>25</i>       | 24.1        | 19.2          | 18.8            | 20.0            | 25.4                 | 17.8                 | 0.8             | 22.5             | 22.5                    | 25.1                 |
| <i>30</i>       | 28.5        | 23.7          | 23.2            | 24.4            | 30.7                 | 21.7                 | 0.9             | 27.1             | 27.0                    | 29.8                 |
| <i>35</i>       | 33.9        | 28.3          | 28.0            | 29.2            | 36.4                 | 26.8                 | 1.2             | 32.4             | 32.1                    | 33.5                 |
| <i>40</i>       | 39.1        | 33.0          | 32.7            | 34.1            | 42.3                 | 32.6                 | 1.5             | 37.2             | 36.8                    | 36.5                 |
| <i>45</i>       | 44.1        | 38.4          | 38.3            | 39.8            | 49.6                 | 38.8                 | 1.9             | 42.7             | 42.4                    | 40.7                 |
| <i>50</i>       | 50.9        | 44.6          | 45.1            | 45.9            | 50.7                 | 45.5                 | 2.6             | 48.9             | 48.4                    | 44.5                 |
| <i>55</i>       | 57.4        | 51.1          | 52.5            | 52.8            | 52.0                 | 59.2                 | 96.0            | 55.8             | 54.9                    | 49.4                 |
| <i>60</i>       | 62.6        | 56.5          | 57.6            | 58.5            | 57.8                 | 64.7                 | 96.5            | 61.0             | 60.2                    | 53.8                 |
| <i>65</i>       | 67.6        | 61.2          | 62.3            | 63.3            | 63.6                 | 69.9                 | 97.1            | 66.1             | 65.1                    | 59.1                 |
| <i>70</i>       | 72.4        | 65.5          | 66.7            | 67.8            | 69.1                 | 74.9                 | 97.9            | 71.2             | 69.8                    | 63.5                 |
| <i>75</i>       | 76.3        | 70.5          | 71.6            | 72.5            | 73.3                 | 79.3                 | 98.2            | 75.6             | 74.4                    | 68.1                 |
| <i>80</i>       | 81.3        | 74.5          | 75.7            | 77.3            | 78.3                 | 83.4                 | 98.7            | 80.8             | 79.9                    | 73.1                 |
| <i>85</i>       | 85.7        | 79.4          | 80.4            | 82.5            | 83.0                 | 87.6                 | 99.0            | 85.4             | 85.0                    | 77.3                 |
| <i>90</i>       | 89.9        | 84.2          | 84.9            | 86.9            | 87.4                 | 91.4                 | 99.3            | 90.2             | 89.1                    | 81.4                 |
| <i>95</i>       | 94.1        | 89.2          | 89.7            | 91.4            | 91.6                 | 95.2                 | 99.6            | 94.3             | 93.7                    | 87.2                 |
| <i>97.5</i>     | 96.2        | 91.9          | 92.5            | 94.0            | 93.9                 | 96.9                 | 99.7            | 96.6             | 96.3                    | 90.3                 |
| <i>99</i>       | 97.6        | 94.5          | 94.9            | 95.8            | 95.9                 | 98.1                 | 99.7            | 97.9             | 97.0                    | 92.7                 |
