# Supplementary material for: Interval forecasts of weekly incident and cumulative COVID-19 mortality in the United States: A comparison of combining methods
Source: PubMed Central journal article supplement (PMC8963571; doi:10.1371/journal.pone.0266096), 2022-03-29
Supplement: pone.0266096.s008.pdf [file pone.0266096.s008.pdf]

**S7 Table. For incident mortality, calibration for low mortality locations.**

| <b>Quantile</b> | <b>Mean</b> | <b>Median</b> | <b>Ensemble</b> | <b>Sym trim</b> | <b>Exterior trim</b> | <b>Interior trim</b> | <b>Envelope</b> | <b>Inv score</b> | <b>Inv score tuning</b> | <b>Previous best</b> |
|-----------------|-------------|---------------|-----------------|-----------------|----------------------|----------------------|-----------------|------------------|-------------------------|----------------------|
| <i>1</i>        | 9.2         | 5.9           | 5.8             | 7.1             | 10.0                 | 6.1                  | 3.8             | 6.4              | 6.2                     | 6.3                  |
| <i>2.5</i>      | 11.2        | 8.0           | 7.7             | 8.7             | 12.1                 | 7.1                  | 3.8             | 8.5              | 7.8                     | 8.0                  |
| <i>5</i>        | 13.3        | 10.0          | 9.5             | 10.7            | 14.7                 | 9.1                  | 3.8             | 11.2             | 10.3                    | 10.4                 |
| <i>10</i>       | 18.4        | 14.9          | 13.9            | 14.7            | 19.4                 | 12.6                 | 3.8             | 16.0             | 14.9                    | 15.8                 |
| <i>15</i>       | 22.9        | 19.7          | 18.1            | 18.4            | 24.1                 | 16.3                 | 3.8             | 20.6             | 19.9                    | 20.4                 |
| <i>20</i>       | 27.1        | 23.6          | 22.3            | 22.9            | 28.8                 | 20.8                 | 4.0             | 25.4             | 24.4                    | 24.2                 |
| <i>25</i>       | 31.7        | 28.6          | 26.6            | 27.1            | 33.2                 | 24.8                 | 4.2             | 29.7             | 28.7                    | 28.6                 |
| <i>30</i>       | 35.6        | 32.9          | 31.0            | 31.3            | 37.2                 | 28.9                 | 4.4             | 34.2             | 32.8                    | 32.8                 |
| <i>35</i>       | 39.7        | 37.1          | 35.0            | 35.4            | 41.7                 | 33.9                 | 4.7             | 38.2             | 37.0                    | 36.6                 |
| <i>40</i>       | 44.1        | 41.3          | 38.8            | 40.2            | 46.6                 | 38.8                 | 5.3             | 42.4             | 41.2                    | 40.1                 |
| <i>45</i>       | 48.4        | 45.1          | 42.9            | 44.1            | 51.0                 | 44.1                 | 6.2             | 46.5             | 45.5                    | 44.5                 |
| <i>50</i>       | 53.2        | 49.6          | 49.7            | 49.1            | 52.0                 | 49.8                 | 8.1             | 51.2             | 50.2                    | 48.3                 |
| <i>55</i>       | 61.5        | 55.7          | 57.6            | 55.6            | 54.3                 | 63.8                 | 96.5            | 59.1             | 56.1                    | 52.4                 |
| <i>60</i>       | 67.1        | 60.1          | 62.2            | 60.5            | 61.7                 | 68.6                 | 97.3            | 64.6             | 61.1                    | 54.7                 |
| <i>65</i>       | 71.9        | 64.1          | 65.8            | 64.7            | 67.2                 | 74.0                 | 98.0            | 68.9             | 65.4                    | 58.6                 |
| <i>70</i>       | 76.8        | 68.0          | 69.5            | 69.3            | 71.7                 | 79.0                 | 98.6            | 73.3             | 70.1                    | 63.3                 |
| <i>75</i>       | 80.8        | 71.9          | 73.4            | 72.8            | 75.8                 | 82.8                 | 99.2            | 77.5             | 74.4                    | 67.9                 |
| <i>80</i>       | 85.3        | 75.8          | 77.3            | 77.1            | 80.8                 | 87.2                 | 99.5            | 81.8             | 78.8                    | 72.0                 |
| <i>85</i>       | 89.0        | 80.7          | 81.9            | 81.4            | 84.0                 | 90.6                 | 99.7            | 86.4             | 83.5                    | 76.3                 |
| <i>90</i>       | 92.1        | 85.1          | 85.8            | 86.6            | 88.0                 | 93.5                 | 99.8            | 90.8             | 87.9                    | 81.7                 |
| <i>95</i>       | 95.4        | 90.1          | 90.7            | 91.9            | 92.0                 | 96.3                 | 99.9            | 95.0             | 93.1                    | 87.0                 |
| <i>97.5</i>     | 97.3        | 93.0          | 93.6            | 94.7            | 94.4                 | 98.0                 | 100.0           | 97.0             | 95.7                    | 90.7                 |
| <i>99</i>       | 98.7        | 94.9          | 95.3            | 96.3            | 96.6                 | 99.1                 | 100.0           | 98.8             | 97.6                    | 93.0                 |
