# Supplementary material for: Interval forecasts of weekly incident and cumulative COVID-19 mortality in the United States: A comparison of combining methods
Source: PubMed Central journal article supplement (PMC8963571; doi:10.1371/journal.pone.0266096), 2022-03-29
Supplement: pone.0266096.s009.pdf [file pone.0266096.s009.pdf]

**S8 Table. For cumulative mortality, 95% interval MIS and MWIS for each prediction horizon.**

| Method               | 95% interval MIS   |                     |                    |                    |                   | MWIS              |                    |                    |                  |                  |
|----------------------|--------------------|---------------------|--------------------|--------------------|-------------------|-------------------|--------------------|--------------------|------------------|------------------|
|                      | All                | U.S.                | High               | Med                | Low               | All               | U.S.               | High               | Med              | Low              |
| <i>1 week ahead</i>  |                    |                     |                    |                    |                   |                   |                    |                    |                  |                  |
| Mean                 | 6283               | 107370              | 9357               | 2445               | 1101              | 202               | 3806               | 283                | 78               | 34               |
| Median               | 2355 <sup>ab</sup> | 29080 <sup>b</sup>  | 4791 <sup>b</sup>  | 465 <sup>ab</sup>  | 237 <sup>b</sup>  | 93 <sup>ab</sup>  | 1567 <sup>b</sup>  | 158 <sup>b</sup>   | 24 <sup>ab</sup> | 11 <sup>ab</sup> |
| Ensemble             | 2364 <sup>b</sup>  | 30211 <sup>b</sup>  | 4749 <sup>bc</sup> | 470 <sup>b</sup>   | 235 <sup>ab</sup> | 93 <sup>ab</sup>  | 1559 <sup>ab</sup> | 157 <sup>abc</sup> | 24 <sup>ab</sup> | 11 <sup>ab</sup> |
| Sym trim             | 2723 <sup>b</sup>  | 32310 <sup>b</sup>  | 5376 <sup>b</sup>  | 694 <sup>b</sup>   | 359 <sup>b</sup>  | 101 <sup>b</sup>  | 1652 <sup>b</sup>  | 171 <sup>b</sup>   | 28 <sup>b</sup>  | 13 <sup>b</sup>  |
| Exterior trim        | 5642 <sup>b</sup>  | 92082 <sup>b</sup>  | 8593 <sup>b</sup>  | 2205 <sup>b</sup>  | 1043 <sup>b</sup> | 166 <sup>b</sup>  | 2893 <sup>b</sup>  | 246 <sup>b</sup>   | 63 <sup>b</sup>  | 29 <sup>b</sup>  |
| Interior trim        | 2444 <sup>b</sup>  | 23852               | 4379 <sup>ab</sup> | 1075 <sup>b</sup>  | 619 <sup>b</sup>  | 134 <sup>b</sup>  | 2120 <sup>b</sup>  | 206 <sup>b</sup>   | 52 <sup>b</sup>  | 26 <sup>b</sup>  |
| Envelope             | 5076 <sup>b</sup>  | 97199               | 7209 <sup>b</sup>  | 1941 <sup>b</sup>  | 659 <sup>b</sup>  | 780               | 17437              | 927                | 329              | 103              |
| Inv score            | 3737 <sup>b</sup>  | 30588 <sup>b</sup>  | 6840 <sup>b</sup>  | 1878 <sup>b</sup>  | 914 <sup>b</sup>  | 130 <sup>b</sup>  | 1865 <sup>b</sup>  | 208 <sup>b</sup>   | 54 <sup>b</sup>  | 27 <sup>b</sup>  |
| Inv score tuning     | 4225 <sup>b</sup>  | 22738 <sup>b</sup>  | 7784               | 2961               | 842               | 128 <sup>b</sup>  | 1644 <sup>b</sup>  | 214 <sup>b</sup>   | 57 <sup>b</sup>  | 24 <sup>b</sup>  |
| Previous best        | 5232               | 20629 <sup>ab</sup> | 9196               | 5120               | 473               | 130 <sup>b</sup>  | 1609 <sup>b</sup>  | 218 <sup>b</sup>   | 69               | 17 <sup>b</sup>  |
| <i>2 weeks ahead</i> |                    |                     |                    |                    |                   |                   |                    |                    |                  |                  |
| Mean                 | 5912               | 89926               | 9250               | 2463               | 1080              | 227               | 3907               | 335                | 92               | 37               |
| Median               | 2574 <sup>ab</sup> | 26967 <sup>b</sup>  | 5222 <sup>b</sup>  | 788 <sup>ab</sup>  | 278 <sup>ab</sup> | 123 <sup>ab</sup> | 1966 <sup>b</sup>  | 201 <sup>b</sup>   | 43 <sup>ab</sup> | 16 <sup>ab</sup> |
| Ensemble             | 2630 <sup>b</sup>  | 30649 <sup>b</sup>  | 5164 <sup>ab</sup> | 800 <sup>b</sup>   | 279 <sup>b</sup>  | 124 <sup>b</sup>  | 2038 <sup>b</sup>  | 199 <sup>ab</sup>  | 43 <sup>ab</sup> | 16 <sup>ab</sup> |
| Sym trim             | 2894 <sup>b</sup>  | 28487 <sup>b</sup>  | 5792 <sup>b</sup>  | 1000 <sup>b</sup>  | 384 <sup>b</sup>  | 131 <sup>b</sup>  | 1994 <sup>b</sup>  | 218 <sup>b</sup>   | 47 <sup>b</sup>  | 18 <sup>b</sup>  |
| Exterior trim        | 5687 <sup>b</sup>  | 85822               | 8922 <sup>b</sup>  | 2370 <sup>b</sup>  | 1056              | 196 <sup>b</sup>  | 3127 <sup>b</sup>  | 303 <sup>b</sup>   | 80 <sup>b</sup>  | 33 <sup>b</sup>  |
| Interior trim        | 3157 <sup>b</sup>  | 25998 <sup>b</sup>  | 6126               | 1334 <sup>b</sup>  | 667 <sup>b</sup>  | 208               | 2518 <sup>b</sup>  | 387                | 71 <sup>b</sup>  | 31 <sup>b</sup>  |
| Envelope             | 6525               | 114668              | 9762               | 2510               | 942               | 954               | 19297              | 1278               | 384              | 121              |
| Inv score            | 3785 <sup>b</sup>  | 24350 <sup>b</sup>  | 7121 <sup>b</sup>  | 2088               | 937               | 162 <sup>b</sup>  | 2135 <sup>b</sup>  | 266 <sup>b</sup>   | 71 <sup>b</sup>  | 32 <sup>b</sup>  |
| Inv score tuning     | 4301 <sup>b</sup>  | 19548 <sup>ab</sup> | 7940               | 3198               | 869               | 154 <sup>b</sup>  | 1933 <sup>ab</sup> | 254 <sup>b</sup>   | 75 <sup>b</sup>  | 29 <sup>b</sup>  |
| Previous best        | 5684               | 27102 <sup>b</sup>  | 9635               | 5597               | 559               | 166 <sup>b</sup>  | 2100 <sup>b</sup>  | 266 <sup>b</sup>   | 95               | 23               |
| <i>3 weeks ahead</i> |                    |                     |                    |                    |                   |                   |                    |                    |                  |                  |
| Mean                 | 4971               | 78958               | 8254               | 1800               | 507               | 235               | 4203               | 355                | 89               | 27               |
| Median               | 2873 <sup>b</sup>  | 29160               | 5671 <sup>b</sup>  | 1077 <sup>b</sup>  | 326 <sup>b</sup>  | 156 <sup>b</sup>  | 2488 <sup>b</sup>  | 247 <sup>b</sup>   | 63 <sup>ab</sup> | 20 <sup>ab</sup> |
| Ensemble             | 2907 <sup>b</sup>  | 31733               | 5617 <sup>b</sup>  | 1082 <sup>b</sup>  | 328 <sup>b</sup>  | 155 <sup>ab</sup> | 2484 <sup>b</sup>  | 245 <sup>ab</sup>  | 64 <sup>b</sup>  | 20 <sup>ab</sup> |
| Sym trim             | 3040 <sup>b</sup>  | 34160               | 5832 <sup>b</sup>  | 1138 <sup>b</sup>  | 320 <sup>b</sup>  | 162 <sup>b</sup>  | 2591 <sup>b</sup>  | 258 <sup>b</sup>   | 65 <sup>b</sup>  | 20 <sup>ab</sup> |
| Exterior trim        | 5034               | 80925               | 8288               | 1843               | 508               | 212 <sup>b</sup>  | 3552 <sup>b</sup>  | 332 <sup>b</sup>   | 81 <sup>b</sup>  | 25 <sup>b</sup>  |
| Interior trim        | 3293               | 31080               | 6874               | 1069 <sup>ab</sup> | 301 <sup>b</sup>  | 252               | 3136               | 491                | 73 <sup>b</sup>  | 23 <sup>b</sup>  |
| Envelope             | 8114               | 147130              | 11750              | 3032               | 1381              | 1081              | 21951              | 1499               | 403              | 113              |
| Inv score            | 2908 <sup>b</sup>  | 27823               | 5911 <sup>b</sup>  | 1070 <sup>b</sup>  | 277 <sup>ab</sup> | 172 <sup>b</sup>  | 2627 <sup>b</sup>  | 285 <sup>b</sup>   | 67 <sup>b</sup>  | 21 <sup>b</sup>  |
| Inv score tuning     | 2791 <sup>ab</sup> | 24017 <sup>ab</sup> | 5604 <sup>ab</sup> | 1231 <sup>b</sup>  | 290 <sup>b</sup>  | 159 <sup>b</sup>  | 2385 <sup>ab</sup> | 257 <sup>b</sup>   | 69 <sup>b</sup>  | 21 <sup>b</sup>  |
| Previous best        | 3764               | 36374               | 7336               | 1664               | 373 <sup>b</sup>  | 183 <sup>b</sup>  | 2793               | 280                | 90               | 24               |
| <i>4 weeks ahead</i> |                    |                     |                    |                    |                   |                   |                    |                    |                  |                  |
| Mean                 | 4993               | 73035               | 8425               | 1985               | 568               | 271               | 4706               | 410                | 109              | 32               |
| Median               | 3335 <sup>b</sup>  | 35545               | 6373 <sup>b</sup>  | 1352 <sup>ab</sup> | 384 <sup>b</sup>  | 200 <sup>ab</sup> | 3306               | 307 <sup>b</sup>   | 85 <sup>ab</sup> | 26 <sup>ab</sup> |
| Ensemble             | 3384 <sup>b</sup>  | 39995               | 6248 <sup>b</sup>  | 1368 <sup>b</sup>  | 383 <sup>b</sup>  | 200 <sup>ab</sup> | 3338               | 302 <sup>ab</sup>  | 86 <sup>b</sup>  | 26 <sup>ab</sup> |
| Sym trim             | 3517 <sup>b</sup>  | 41194               | 6527 <sup>b</sup>  | 1435 <sup>b</sup>  | 375 <sup>b</sup>  | 208 <sup>b</sup>  | 3423               | 320 <sup>b</sup>   | 88 <sup>b</sup>  | 26 <sup>ab</sup> |
| Exterior trim        | 5188               | 76633               | 8726               | 2092               | 544               | 254 <sup>b</sup>  | 4195               | 397                | 103 <sup>b</sup> | 30 <sup>b</sup>  |
| Interior trim        | 3920               | 40403               | 7794               | 1403 <sup>b</sup>  | 417 <sup>b</sup>  | 311               | 3960               | 592                | 96 <sup>b</sup>  | 30 <sup>b</sup>  |
| Envelope             | 11944              | 258403              | 14536              | 4241               | 2558              | 1292              | 25886              | 1789               | 490              | 151              |
| Inv score            | 3286 <sup>b</sup>  | 33773               | 6369 <sup>b</sup>  | 1356 <sup>b</sup>  | 340 <sup>ab</sup> | 216 <sup>b</sup>  | 3355               | 346 <sup>b</sup>   | 89 <sup>b</sup>  | 26 <sup>ab</sup> |
| Inv score tuning     | 3187 <sup>ab</sup> | 32193 <sup>a</sup>  | 5943 <sup>ab</sup> | 1558 <sup>b</sup>  | 354 <sup>b</sup>  | 201 <sup>b</sup>  | 3117 <sup>a</sup>  | 312 <sup>b</sup>   | 92 <sup>b</sup>  | 27 <sup>b</sup>  |
| Previous best        | 4465               | 48258               | 8206               | 2146               | 466               | 240               | 3820               | 358                | 121              | 32               |

Lower values are better. <sup>a</sup> best method for each horizon in each column; <sup>b</sup> score is significantly lower than the mean combination; <sup>c</sup> score is significantly lower than the median combination.
