# Supplementary material for: Interval forecasts of weekly incident and cumulative COVID-19 mortality in the United States: A comparison of combining methods
Source: PubMed Central journal article supplement (PMC8963571; doi:10.1371/journal.pone.0266096), 2022-03-29
Supplement: pone.0266096.s010.pdf [file pone.0266096.s010.pdf]

**S9 Table. For cumulative mortality, calibration for all locations.**

| <b>Quantile</b> | <b>Mean</b> | <b>Median</b> | <b>Ensemble</b> | <b>Sym trim</b> | <b>Exterior trim</b> | <b>Interior trim</b> | <b>Envelope</b> | <b>Inv score</b> | <b>Inv score tuning</b> | <b>Previous best</b> |
|-----------------|-------------|---------------|-----------------|-----------------|----------------------|----------------------|-----------------|------------------|-------------------------|----------------------|
| <i>1</i>        | 18.0        | 3.2           | 3.3             | 4.8             | 19.1                 | 3.1                  | 1.3             | 5.1              | 4.6                     | 4.4                  |
| <i>2.5</i>      | 20.0        | 4.5           | 4.6             | 6.1             | 21.2                 | 4.2                  | 1.4             | 7.3              | 6.3                     | 6.2                  |
| <i>5</i>        | 22.1        | 6.2           | 6.3             | 7.8             | 23.7                 | 5.8                  | 1.5             | 10.1             | 8.5                     | 9.0                  |
| <i>10</i>       | 26.0        | 9.6           | 9.6             | 11.0            | 28.2                 | 8.9                  | 1.6             | 14.9             | 12.0                    | 13.8                 |
| <i>15</i>       | 29.9        | 12.9          | 13.1            | 14.5            | 32.3                 | 12.1                 | 1.7             | 19.5             | 16.3                    | 18.0                 |
| <i>20</i>       | 33.6        | 16.6          | 16.7            | 17.8            | 36.2                 | 15.5                 | 1.7             | 23.5             | 20.1                    | 21.7                 |
| <i>25</i>       | 37.2        | 20.2          | 20.6            | 21.3            | 39.9                 | 19.5                 | 1.9             | 27.6             | 24.4                    | 25.8                 |
| <i>30</i>       | 41.1        | 24.3          | 24.8            | 25.7            | 44.0                 | 23.6                 | 2.0             | 32.0             | 28.9                    | 30.2                 |
| <i>35</i>       | 44.9        | 29.1          | 29.4            | 30.2            | 48.2                 | 27.9                 | 2.3             | 36.2             | 33.4                    | 34.2                 |
| <i>40</i>       | 48.9        | 33.5          | 33.8            | 34.7            | 52.6                 | 32.7                 | 2.5             | 40.8             | 38.1                    | 38.0                 |
| <i>45</i>       | 53.1        | 38.1          | 38.4            | 39.4            | 55.6                 | 38.7                 | 3.1             | 45.5             | 43.2                    | 42.0                 |
| <i>50</i>       | 58.0        | 43.7          | 44.8            | 45.6            | 56.5                 | 45.1                 | 4.0             | 51.3             | 48.9                    | 46.1                 |
| <i>55</i>       | 63.5        | 50.4          | 52.2            | 52.5            | 57.5                 | 66.0                 | 95.0            | 58.0             | 55.3                    | 50.9                 |
| <i>60</i>       | 67.9        | 55.7          | 57.4            | 58.0            | 60.9                 | 70.5                 | 95.7            | 63.0             | 60.5                    | 55.3                 |
| <i>65</i>       | 71.8        | 60.3          | 61.8            | 62.7            | 65.6                 | 74.1                 | 96.3            | 67.6             | 64.9                    | 59.0                 |
| <i>70</i>       | 75.4        | 64.7          | 66.1            | 67.1            | 69.4                 | 77.7                 | 96.8            | 71.8             | 69.6                    | 62.9                 |
| <i>75</i>       | 78.9        | 69.0          | 70.4            | 71.4            | 73.4                 | 81.2                 | 97.3            | 75.6             | 73.9                    | 67.0                 |
| <i>80</i>       | 82.1        | 73.5          | 74.7            | 75.7            | 76.7                 | 84.5                 | 97.7            | 79.7             | 78.1                    | 71.0                 |
| <i>85</i>       | 85.4        | 77.9          | 78.9            | 80.2            | 80.4                 | 87.9                 | 98.1            | 83.8             | 82.5                    | 75.7                 |
| <i>90</i>       | 88.6        | 82.3          | 83.0            | 84.8            | 84.0                 | 90.9                 | 98.4            | 87.6             | 86.7                    | 80.1                 |
| <i>95</i>       | 92.1        | 87.0          | 87.6            | 89.1            | 88.6                 | 94.3                 | 98.8            | 91.8             | 90.8                    | 85.5                 |
| <i>97.5</i>     | 94.1        | 90.1          | 90.4            | 91.8            | 91.3                 | 96.2                 | 99.1            | 94.4             | 93.3                    | 88.9                 |
| <i>99</i>       | 95.8        | 92.3          | 92.5            | 93.9            | 93.6                 | 97.6                 | 99.3            | 96.1             | 95.3                    | 91.7                 |
