# Supplementary material for: Interval forecasts of weekly incident and cumulative COVID-19 mortality in the United States: A comparison of combining methods
Source: PubMed Central journal article supplement (PMC8963571; doi:10.1371/journal.pone.0266096), 2022-03-29
Supplement: pone.0266096.s011.pdf [file pone.0266096.s011.pdf]

**S10 Table. For cumulative mortality, calibration for U.S.**

| <b>Quantile</b> | <b>Mean</b> | <b>Median</b> | <b>Ensemble</b> | <b>Sym trim</b> | <b>Exterior trim</b> | <b>Interior trim</b> | <b>Envelope</b> | <b>Inv score</b> | <b>Inv score tuning</b> | <b>Previous best</b> |
|-----------------|-------------|---------------|-----------------|-----------------|----------------------|----------------------|-----------------|------------------|-------------------------|----------------------|
| <i>1</i>        | 16.0        | 0.0           | 0.6             | 1.3             | 16.3                 | 0.0                  | 0.0             | 1.6              | 0.0                     | 0.0                  |
| <i>2.5</i>      | 17.0        | 0.0           | 0.6             | 1.3             | 17.3                 | 0.0                  | 0.0             | 2.9              | 0.3                     | 0.0                  |
| <i>5</i>        | 18.3        | 0.0           | 0.6             | 1.6             | 18.6                 | 0.0                  | 0.0             | 5.5              | 1.0                     | 1.9                  |
| <i>10</i>       | 18.9        | 1.6           | 1.9             | 3.6             | 19.9                 | 0.0                  | 0.0             | 7.5              | 2.6                     | 10.1                 |
| <i>15</i>       | 21.9        | 3.6           | 4.9             | 6.5             | 22.2                 | 2.3                  | 0.0             | 10.4             | 5.2                     | 11.7                 |
| <i>20</i>       | 22.5        | 6.8           | 7.1             | 7.8             | 24.2                 | 4.5                  | 0.0             | 12.4             | 8.8                     | 14.3                 |
| <i>25</i>       | 25.8        | 8.8           | 9.4             | 9.4             | 25.8                 | 6.2                  | 0.0             | 13.7             | 12.7                    | 18.3                 |
| <i>30</i>       | 27.8        | 13.0          | 14.3            | 12.4            | 28.1                 | 10.4                 | 0.0             | 18.3             | 15.0                    | 22.5                 |
| <i>35</i>       | 30.4        | 16.0          | 17.6            | 17.6            | 32.4                 | 15.0                 | 0.0             | 21.2             | 17.6                    | 23.8                 |
| <i>40</i>       | 34.7        | 19.6          | 20.5            | 19.3            | 35.3                 | 19.6                 | 0.0             | 23.8             | 20.2                    | 26.4                 |
| <i>45</i>       | 37.9        | 23.8          | 24.5            | 25.2            | 38.9                 | 24.5                 | 0.6             | 27.4             | 24.8                    | 32.3                 |
| <i>50</i>       | 43.5        | 29.4          | 30.4            | 32.4            | 41.5                 | 30.1                 | 1.0             | 31.4             | 28.8                    | 38.5                 |
| <i>55</i>       | 48.1        | 35.0          | 36.0            | 37.0            | 43.2                 | 48.4                 | 91.9            | 38.3             | 35.9                    | 43.8                 |
| <i>60</i>       | 51.0        | 38.9          | 40.2            | 40.6            | 45.2                 | 51.7                 | 92.5            | 43.9             | 43.9                    | 46.4                 |
| <i>65</i>       | 54.3        | 41.2          | 43.5            | 42.5            | 49.4                 | 55.0                 | 93.2            | 47.4             | 47.1                    | 47.1                 |
| <i>70</i>       | 58.3        | 44.9          | 45.2            | 46.8            | 53.1                 | 58.3                 | 93.8            | 51.4             | 52.7                    | 50.0                 |
| <i>75</i>       | 61.2        | 51.4          | 51.1            | 52.7            | 56.0                 | 63.2                 | 95.5            | 58.0             | 56.0                    | 54.0                 |
| <i>80</i>       | 64.8        | 57.3          | 56.9            | 57.9            | 59.9                 | 67.8                 | 96.8            | 63.5             | 60.9                    | 60.2                 |
| <i>85</i>       | 71.7        | 62.9          | 62.2            | 66.1            | 66.8                 | 76.2                 | 97.7            | 70.1             | 68.4                    | 65.7                 |
| <i>90</i>       | 76.9        | 69.1          | 69.1            | 75.6            | 74.3                 | 81.5                 | 99.0            | 77.9             | 77.3                    | 71.6                 |
| <i>95</i>       | 84.7        | 79.5          | 78.5            | 84.4            | 82.1                 | 87.3                 | 99.7            | 85.1             | 88.0                    | 89.9                 |
| <i>97.5</i>     | 89.3        | 84.4          | 82.4            | 87.0            | 85.7                 | 91.9                 | 100.0           | 91.6             | 92.9                    | 89.3                 |
| <i>99</i>       | 92.3        | 87.7          | 85.4            | 89.6            | 89.0                 | 94.5                 | 100.0           | 95.2             | 95.5                    | 95.5                 |
