# Supplementary material for: Interval forecasts of weekly incident and cumulative COVID-19 mortality in the United States: A comparison of combining methods
Source: PubMed Central journal article supplement (PMC8963571; doi:10.1371/journal.pone.0266096), 2022-03-29
Supplement: pone.0266096.s012.pdf [file pone.0266096.s012.pdf]

**S11 Table. For cumulative mortality, calibration for high mortality locations.**

| <b>Quantile</b> | <b>Mean</b> | <b>Median</b> | <b>Ensemble</b> | <b>Sym trim</b> | <b>Exterior trim</b> | <b>Interior trim</b> | <b>Envelope</b> | <b>Inv score</b> | <b>Inv score tuning</b> | <b>Previous best</b> |
|-----------------|-------------|---------------|-----------------|-----------------|----------------------|----------------------|-----------------|------------------|-------------------------|----------------------|
| <i>1</i>        | 19.0        | 4.8           | 4.9             | 5.6             | 20.3                 | 4.4                  | 2.3             | 5.5              | 5.5                     | 5.1                  |
| <i>2.5</i>      | 21.1        | 6.0           | 6.0             | 6.8             | 22.6                 | 5.2                  | 2.3             | 7.5              | 7.0                     | 6.9                  |
| <i>5</i>        | 23.1        | 7.6           | 7.6             | 8.0             | 24.9                 | 6.7                  | 2.4             | 9.8              | 8.4                     | 9.5                  |
| <i>10</i>       | 26.8        | 10.4          | 10.4            | 11.0            | 29.1                 | 9.6                  | 2.5             | 14.3             | 11.2                    | 13.5                 |
| <i>15</i>       | 30.4        | 13.0          | 13.3            | 14.0            | 32.8                 | 12.8                 | 2.5             | 18.4             | 14.5                    | 17.9                 |
| <i>20</i>       | 33.8        | 16.5          | 16.6            | 17.6            | 36.5                 | 15.7                 | 2.7             | 22.4             | 17.5                    | 22.1                 |
| <i>25</i>       | 37.4        | 20.4          | 21.0            | 21.0            | 40.4                 | 19.3                 | 3.0             | 26.4             | 21.9                    | 26.2                 |
| <i>30</i>       | 41.0        | 24.5          | 25.4            | 25.7            | 44.3                 | 23.1                 | 3.2             | 30.6             | 26.5                    | 30.5                 |
| <i>35</i>       | 44.6        | 29.7          | 30.4            | 30.2            | 48.1                 | 27.8                 | 3.3             | 35.0             | 31.1                    | 35.2                 |
| <i>40</i>       | 48.8        | 33.9          | 35.2            | 34.8            | 52.7                 | 32.5                 | 3.5             | 40.0             | 36.3                    | 39.9                 |
| <i>45</i>       | 53.2        | 38.9          | 40.2            | 40.0            | 56.0                 | 39.6                 | 3.8             | 45.5             | 42.8                    | 43.9                 |
| <i>50</i>       | 58.4        | 44.6          | 46.3            | 46.2            | 57.2                 | 45.7                 | 4.1             | 51.4             | 49.2                    | 48.5                 |
| <i>55</i>       | 63.3        | 51.3          | 53.3            | 52.2            | 58.0                 | 66.6                 | 97.0            | 58.1             | 56.1                    | 55.1                 |
| <i>60</i>       | 68.4        | 57.3          | 59.2            | 58.7            | 61.7                 | 71.6                 | 97.8            | 63.8             | 62.3                    | 60.3                 |
| <i>65</i>       | 72.7        | 62.3          | 64.2            | 64.3            | 66.5                 | 75.2                 | 98.2            | 69.0             | 67.0                    | 64.1                 |
| <i>70</i>       | 76.6        | 67.5          | 69.1            | 69.3            | 70.7                 | 78.8                 | 98.6            | 73.4             | 72.3                    | 68.0                 |
| <i>75</i>       | 80.6        | 72.2          | 73.7            | 74.3            | 75.3                 | 82.7                 | 98.9            | 78.2             | 77.3                    | 72.2                 |
| <i>80</i>       | 83.8        | 76.7          | 78.0            | 78.2            | 78.5                 | 86.2                 | 99.0            | 82.3             | 81.5                    | 76.6                 |
| <i>85</i>       | 87.4        | 81.1          | 82.3            | 83.1            | 82.1                 | 90.1                 | 99.3            | 86.4             | 86.0                    | 80.8                 |
| <i>90</i>       | 90.9        | 85.6          | 86.6            | 87.8            | 85.6                 | 93.0                 | 99.5            | 90.4             | 89.2                    | 86.0                 |
| <i>95</i>       | 94.1        | 90.3          | 91.1            | 92.1            | 90.9                 | 95.8                 | 99.6            | 94.3             | 93.2                    | 89.9                 |
| <i>97.5</i>     | 95.9        | 93.5          | 93.9            | 94.5            | 93.1                 | 97.4                 | 99.7            | 96.9             | 95.5                    | 92.9                 |
| <i>99</i>       | 97.4        | 95.7          | 95.7            | 96.4            | 95.2                 | 98.4                 | 99.8            | 98.3             | 97.6                    | 94.4                 |
