# Supplementary material for: Interval forecasts of weekly incident and cumulative COVID-19 mortality in the United States: A comparison of combining methods
Source: PubMed Central journal article supplement (PMC8963571; doi:10.1371/journal.pone.0266096), 2022-03-29
Supplement: pone.0266096.s013.pdf [file pone.0266096.s013.pdf]

**S12 Table. For cumulative mortality, calibration for medium mortality locations.**

| <b>Quantile</b> | <b>Mean</b> | <b>Median</b> | <b>Ensemble</b> | <b>Sym trim</b> | <b>Exterior trim</b> | <b>Interior trim</b> | <b>Envelope</b> | <b>Inv score</b> | <b>Inv score tuning</b> | <b>Previous best</b> |
|-----------------|-------------|---------------|-----------------|-----------------|----------------------|----------------------|-----------------|------------------|-------------------------|----------------------|
| <i>1</i>        | 17.7        | 1.5           | 1.6             | 2.7             | 18.9                 | 1.8                  | 0.2             | 3.6              | 3.1                     | 3.3                  |
| <i>2.5</i>      | 19.8        | 2.7           | 2.8             | 4.2             | 21.1                 | 2.8                  | 0.3             | 6.0              | 5.0                     | 4.9                  |
| <i>5</i>        | 22.0        | 4.2           | 4.4             | 5.8             | 23.8                 | 4.0                  | 0.4             | 8.9              | 7.3                     | 8.2                  |
| <i>10</i>       | 26.0        | 7.6           | 7.7             | 9.1             | 28.2                 | 7.2                  | 0.4             | 13.7             | 10.6                    | 13.6                 |
| <i>15</i>       | 29.9        | 10.5          | 10.7            | 12.5            | 32.6                 | 10.5                 | 0.4             | 18.4             | 15.5                    | 17.3                 |
| <i>20</i>       | 33.8        | 14.1          | 14.4            | 15.6            | 36.8                 | 14.4                 | 0.5             | 22.9             | 19.4                    | 20.8                 |
| <i>25</i>       | 37.6        | 18.0          | 18.2            | 19.3            | 40.6                 | 18.7                 | 0.5             | 27.3             | 23.9                    | 24.9                 |
| <i>30</i>       | 42.2        | 22.6          | 23.1            | 24.6            | 44.8                 | 23.1                 | 0.6             | 32.3             | 28.8                    | 29.8                 |
| <i>35</i>       | 46.7        | 27.8          | 28.3            | 29.4            | 49.8                 | 27.3                 | 0.9             | 36.9             | 34.2                    | 33.9                 |
| <i>40</i>       | 50.6        | 32.7          | 33.2            | 34.4            | 54.1                 | 32.6                 | 1.1             | 41.8             | 39.4                    | 37.4                 |
| <i>45</i>       | 54.9        | 37.7          | 38.1            | 39.4            | 57.3                 | 38.5                 | 1.6             | 46.0             | 44.3                    | 42.5                 |
| <i>50</i>       | 60.0        | 44.3          | 45.2            | 46.3            | 58.0                 | 45.6                 | 2.2             | 52.7             | 50.8                    | 47.1                 |
| <i>55</i>       | 65.4        | 52.0          | 53.3            | 54.2            | 58.9                 | 68.0                 | 96.5            | 59.2             | 57.1                    | 51.9                 |
| <i>60</i>       | 69.8        | 57.6          | 58.8            | 59.8            | 62.8                 | 72.3                 | 97.1            | 64.5             | 62.7                    | 56.2                 |
| <i>65</i>       | 73.6        | 62.4          | 63.2            | 64.8            | 67.5                 | 76.0                 | 97.5            | 69.0             | 67.5                    | 60.4                 |
| <i>70</i>       | 77.2        | 66.8          | 67.5            | 69.2            | 71.4                 | 79.6                 | 98.0            | 73.5             | 72.3                    | 65.1                 |
| <i>75</i>       | 80.7        | 70.7          | 71.6            | 73.2            | 75.3                 | 82.7                 | 98.5            | 77.1             | 76.7                    | 69.6                 |
| <i>80</i>       | 83.8        | 75.3          | 76.2            | 77.8            | 78.5                 | 86.1                 | 98.9            | 81.4             | 80.9                    | 73.3                 |
| <i>85</i>       | 87.4        | 80.1          | 80.9            | 82.2            | 82.4                 | 89.3                 | 99.2            | 85.9             | 85.6                    | 77.6                 |
| <i>90</i>       | 90.6        | 84.9          | 85.6            | 86.8            | 86.2                 | 92.1                 | 99.4            | 89.7             | 89.6                    | 81.6                 |
| <i>95</i>       | 94.2        | 89.4          | 89.8            | 91.0            | 90.5                 | 95.5                 | 99.6            | 94.0             | 93.0                    | 86.9                 |
| <i>97.5</i>     | 96.1        | 92.6          | 92.9            | 94.0            | 93.3                 | 97.0                 | 99.7            | 96.1             | 95.4                    | 90.4                 |
| <i>99</i>       | 97.5        | 94.7          | 94.9            | 96.0            | 95.6                 | 98.1                 | 99.9            | 97.6             | 97.0                    | 93.0                 |
