# Supplementary material for: Interval forecasts of weekly incident and cumulative COVID-19 mortality in the United States: A comparison of combining methods
Source: PubMed Central journal article supplement (PMC8963571; doi:10.1371/journal.pone.0266096), 2022-03-29
Supplement: pone.0266096.s014.pdf [file pone.0266096.s014.pdf]

**S13 Table. For cumulative mortality, calibration for low mortality locations**

| <b>Quantile</b> | <b>Mean</b> | <b>Median</b> | <b>Ensemble</b> | <b>Sym trim</b> | <b>Exterior trim</b> | <b>Interior trim</b> | <b>Envelope</b> | <b>Inv score</b> | <b>Inv score tuning</b> | <b>Previous best</b> |
|-----------------|-------------|---------------|-----------------|-----------------|----------------------|----------------------|-----------------|------------------|-------------------------|----------------------|
| <i>1</i>        | 17.0        | 3.5           | 3.5             | 4.4             | 18.4                 | 3.9                  | 1.5             | 4.7              | 4.6                     | 5.4                  |
| <i>2.5</i>      | 19.3        | 5.4           | 5.4             | 6.0             | 20.7                 | 5.6                  | 1.8             | 7.1              | 6.2                     | 7.1                  |
| <i>5</i>        | 21.7        | 7.6           | 7.5             | 8.5             | 23.9                 | 7.9                  | 1.9             | 10.8             | 9.4                     | 10.1                 |
| <i>10</i>       | 26.7        | 11.8          | 11.8            | 12.7            | 29.8                 | 12.1                 | 2.0             | 16.1             | 14.3                    | 15.3                 |
| <i>15</i>       | 31.2        | 16.6          | 16.4            | 17.1            | 34.6                 | 15.8                 | 2.0             | 21.6             | 19.3                    | 20.2                 |
| <i>20</i>       | 35.6        | 21.1          | 20.8            | 21.4            | 39.0                 | 20.0                 | 2.1             | 26.0             | 24.9                    | 24.1                 |
| <i>25</i>       | 39.5        | 25.3          | 25.3            | 25.2            | 43.2                 | 24.7                 | 2.2             | 30.7             | 28.9                    | 29.0                 |
| <i>30</i>       | 43.6        | 29.4          | 29.4            | 29.2            | 48.2                 | 29.2                 | 2.3             | 35.1             | 33.7                    | 33.5                 |
| <i>35</i>       | 47.6        | 34.5          | 33.9            | 33.9            | 52.6                 | 33.0                 | 2.7             | 39.6             | 37.8                    | 37.5                 |
| <i>40</i>       | 52.1        | 39.0          | 37.9            | 38.6            | 57.0                 | 37.8                 | 3.1             | 44.4             | 42.1                    | 41.5                 |
| <i>45</i>       | 56.9        | 43.5          | 42.5            | 43.5            | 60.3                 | 43.5                 | 4.2             | 49.7             | 47.3                    | 44.7                 |
| <i>50</i>       | 62.2        | 48.9          | 50.0            | 50.0            | 60.4                 | 50.2                 | 5.8             | 55.3             | 52.8                    | 48.4                 |
| <i>55</i>       | 68.9        | 55.3          | 58.0            | 57.2            | 61.6                 | 71.0                 | 97.4            | 63.4             | 59.7                    | 52.1                 |
| <i>60</i>       | 73.4        | 60.1          | 62.7            | 62.4            | 64.8                 | 75.3                 | 98.1            | 67.8             | 64.3                    | 56.7                 |
| <i>65</i>       | 77.4        | 64.6          | 66.7            | 66.5            | 69.8                 | 79.1                 | 98.7            | 72.4             | 68.5                    | 60.3                 |
| <i>70</i>       | 81.6        | 69.0          | 71.1            | 71.0            | 73.5                 | 83.0                 | 99.1            | 76.6             | 72.8                    | 63.8                 |
| <i>75</i>       | 84.8        | 73.7          | 75.8            | 74.9            | 77.7                 | 86.3                 | 99.3            | 80.4             | 77.0                    | 68.1                 |
| <i>80</i>       | 88.2        | 78.4          | 79.8            | 79.5            | 81.5                 | 89.4                 | 99.6            | 84.4             | 81.2                    | 72.0                 |
| <i>85</i>       | 90.8        | 82.6          | 83.9            | 84.3            | 85.1                 | 92.0                 | 99.7            | 88.4             | 85.5                    | 77.6                 |
| <i>90</i>       | 93.5        | 86.7          | 87.3            | 88.4            | 88.2                 | 94.7                 | 99.9            | 91.5             | 89.8                    | 81.9                 |
| <i>95</i>       | 96.5        | 91.2          | 92.0            | 92.4            | 92.7                 | 97.2                 | 100.0           | 95.1             | 93.7                    | 87.0                 |
| <i>97.5</i>     | 98.0        | 94.0          | 94.2            | 94.8            | 95.0                 | 98.4                 | 100.0           | 97.4             | 95.9                    | 91.1                 |
| <i>99</i>       | 99.1        | 96.0          | 96.2            | 96.8            | 96.7                 | 99.3                 | 100.0           | 98.8             | 97.4                    | 93.3                 |
