# Supplementary material for: Interval forecasts of weekly incident and cumulative COVID-19 mortality in the United States: A comparison of combining methods
Source: PubMed Central journal article supplement (PMC8963571; doi:10.1371/journal.pone.0266096), 2022-03-29
Supplement: pone.0266096.s015.pdf [file pone.0266096.s015.pdf]

**S14 Table. Sensitivity analysis for incident mortality, skill scores of the 95% interval MIS and MWIS after excluding locations for which there were noticeable changes in reporting patterns.**

| Method           | 95% interval MIS  |                  |                   |                  |                   | MWIS             |                  |                  |                  |                  |
|------------------|-------------------|------------------|-------------------|------------------|-------------------|------------------|------------------|------------------|------------------|------------------|
|                  | All               | U.S.             | High              | Med              | Low               | All              | U.S.             | High             | Med              | Low              |
| Mean             | 0.0               | 0.0              | 0.0               | 0.0              | 0.0               | 0.0              | 0.0              | 0.0              | 0.0              | 0.0              |
| Median           | 9.9               | -4.0             | 16.8              | -1.8             | 16.3              | 6.0              | -1.9             | 8.5              | 3.0              | 7.5              |
| Ensemble         | 11.2              | -11.4            | 18.7 <sup>a</sup> | -0.1             | 17.0 <sup>a</sup> | 6.4 <sup>a</sup> | -3.1             | 9.4 <sup>a</sup> | 3.4 <sup>a</sup> | 7.5 <sup>a</sup> |
| Sym trim         | 9.4               | -2.3             | 15.2              | 1.3              | 13.1              | 4.4              | -1.7             | 4.9              | 2.3              | 6.8              |
| Exterior trim    | -2.3              | -12.8            | -3.3              | -5.0             | 2.7               | 0.5              | -3.1             | 0.5              | -1.5             | 3.1              |
| Interior trim    | 4.3               | -0.5             | 3.0               | 5.1              | 4.9               | 0.5              | -1.2             | 0.1              | 1.2              | 0.3              |
| Envelope         | -239.0            | -503.8           | -253.8            | -168.2           | -313.1            | -258.5           | -266.6           | -297.2           | -220.8           | -267.4           |
| Inv score        | 12.5 <sup>a</sup> | 3.1              | 17.2              | 6.4 <sup>a</sup> | 15.2              | 4.4              | 6.0              | 6.9              | 2.7              | 3.7              |
| Inv score tuning | 8.6               | 6.7 <sup>a</sup> | 16.5              | 0.2              | 9.8               | 1.6              | 7.1 <sup>a</sup> | 6.1              | -1.5             | -0.1             |
| Previous best    | -20.8             | -23.5            | -12.4             | -35.2            | -13.5             | -22.7            | -18.3            | -13.8            | -25.1            | -30.3            |

Shows percentages. Higher values are better. <sup>a</sup> best method in each column.
