# Supplementary material for: Interval forecasts of weekly incident and cumulative COVID-19 mortality in the United States: A comparison of combining methods
Source: PubMed Central journal article supplement (PMC8963571; doi:10.1371/journal.pone.0266096), 2022-03-29
Supplement: pone.0266096.s016.pdf [file pone.0266096.s016.pdf]

**S15 Table. Sensitivity analysis for cumulative mortality, skill scores of the 95% interval MIS and MWIS after excluding locations for which there were noticeable changes in reporting patterns.**

| Method           | 95% interval MIS  |                   |                   |                   |                   | MWIS              |                   |                   |                   |                   |
|------------------|-------------------|-------------------|-------------------|-------------------|-------------------|-------------------|-------------------|-------------------|-------------------|-------------------|
|                  | All               | U.S.              | High              | Med               | Low               | All               | U.S.              | High              | Med               | Low               |
| Mean             | 0.0               | 0.0               | 0.0               | 0.0               | 0.0               | 0.0               | 0.0               | 0.0               | 0.0               | 0.0               |
| Median           | 69.7 <sup>a</sup> | 65.4              | 66.8 <sup>a</sup> | 64.9 <sup>a</sup> | 77.4 <sup>a</sup> | 46.2 <sup>a</sup> | 43.9              | 43.2              | 42.4              | 53.5 <sup>a</sup> |
| Ensemble         | 69.4              | 62.0              | 66.5              | 64.7              | 77.1              | 46.1              | 43.3              | 43.5 <sup>a</sup> | 42.3 <sup>a</sup> | 52.9              |
| Sym trim         | 65.4              | 61.0              | 61.2              | 60.5              | 74.2              | 43.1              | 41.9              | 40.4              | 38.6              | 50.8              |
| Exterior trim    | 5.7               | 4.0               | 5.4               | 3.1               | 9.2               | 12.5              | 17.2              | 12.1              | 10.2              | 15.2              |
| Interior trim    | 47.4              | 65.3              | 49.6              | 47.9              | 42.6              | 18.9              | 29.4              | 21.3              | 19.7              | 14.4              |
| Envelope         | -56.4             | -76.8             | -47.9             | -49.3             | -74.4             | -346.5            | -408.8            | -349.7            | -356.5            | -327.0            |
| Inv score        | 34.0              | 66.6              | 41.7              | 28.5              | 27.7              | 24.9              | 39.9              | 29.6              | 23.1              | 20.3              |
| Inv score tuning | 22.4              | 71.8 <sup>a</sup> | 28.9              | 2.8               | 30.0              | 24.4              | 45.4 <sup>a</sup> | 28.8              | 20.4              | 22.4              |
| Previous best    | 27.5              | 62.1              | 23.0              | -15.9             | 59.9              | 19.4              | 37.9              | 17.8              | 7.4               | 32.1              |

Shows percentages. Higher values are better. <sup>a</sup> best method in each column.
